# Supplementary material for: Recovery of Ionic Liquid from the Model Solution Mixture Mimicking the Catalytically Hydrolyzed Cellulose Product Utilizing Amberlyst Ion-Exchange Resin
Source: MDPI journal article supplement (doi:10.3390/pr12010055), 2023-12-25
Supplement: s1 [file s1]

Archive with 1 entries (1 files):
- processes-2776596-supplementary.pdf
