# Supplementary material for: Recovery of Ionic Liquid from the Model Solution Mixture Mimicking the Catalytically Hydrolyzed Cellulose Product Utilizing Amberlyst Ion-Exchange Resin
Source: MDPI journal article supplement (doi:10.3390/pr12010055), 2023-12-25
Supplement: s1 [file s1 › processes-2776596-supplementary.pdf]

# Recovery of Ionic Liquid from the Model Solution Mixture Mimicking the Catalytically Hydrolyzed Cellulose Product Utilizing Amberlyst Ion-Exchange Resin

Chhabilal Regmi <sup>1,\*</sup>, Chidambaram Thamaraiselvan <sup>1,2</sup>, Zhexi Zhu <sup>3</sup> and Xianghong Qian <sup>3</sup>  
and S. Ranil Wickramasinghe <sup>1,\*</sup>

<sup>1</sup> Ralph E. Martin Department of Chemical Engineering, University of Arkansas, Fayetteville, AR 72701, USA

<sup>2</sup> Interdisciplinary Centre for Energy Research, Indian Institute of Science, Bangalore 560012, India

<sup>3</sup> Department of Biomedical Engineering, University of Arkansas, Fayetteville, AR 72701, USA

\* Correspondence: cregmi@uark.edu (C.R.); swickram@uark.edu (S.R.W.)

## Supplementary Informations

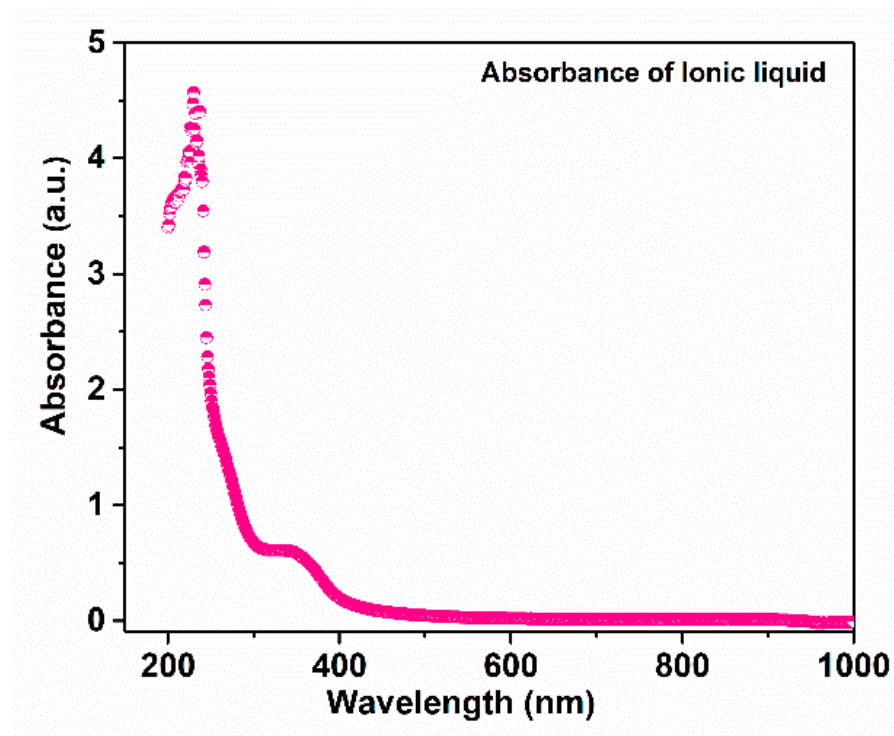

**Figure S1.** Absorption spectra of IL.

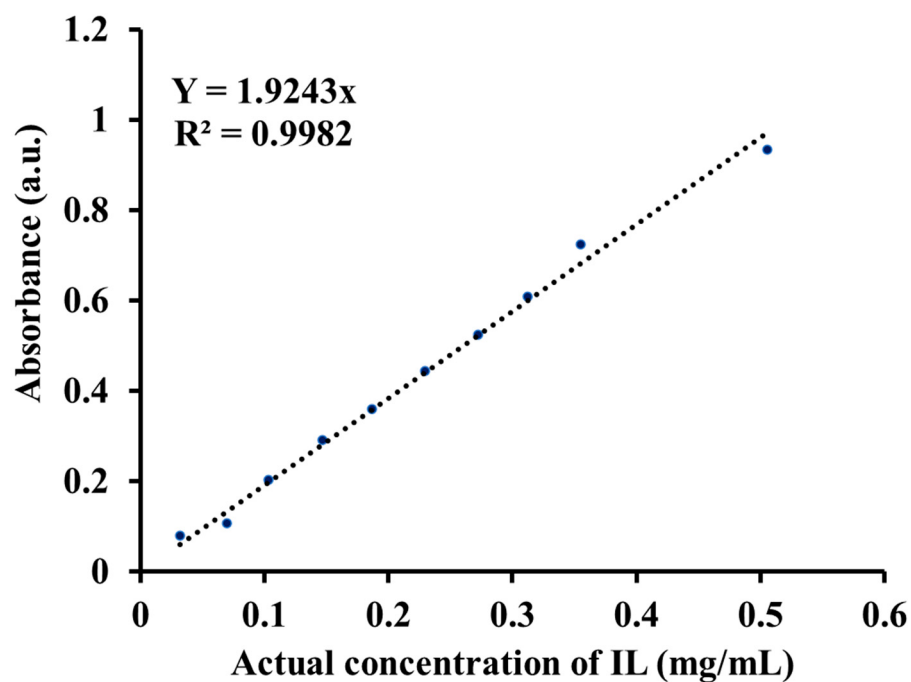

**Figure S2.** Calibration curve for quantitative determination of IL adsorbed; dilution factor  $\times 400$ .

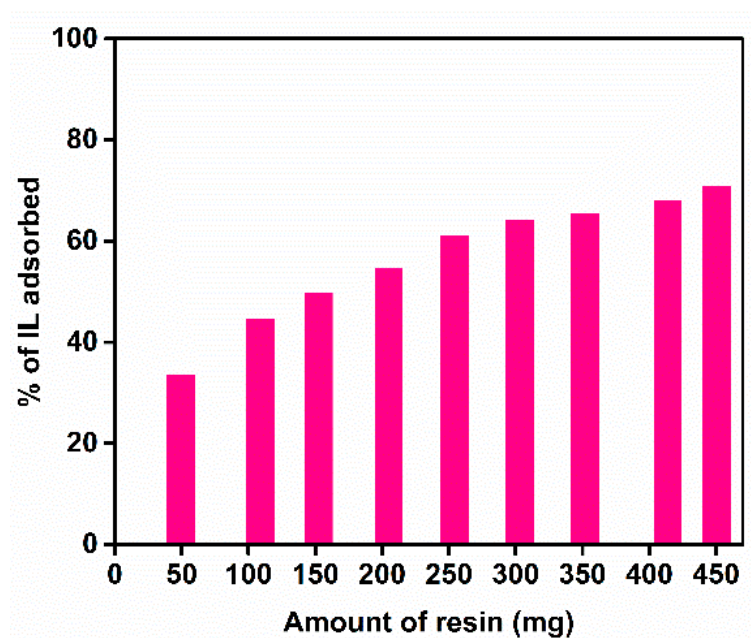

**Figure S3.** IL absorption efficiency from the mixture of IL ( $75 \pm 2$  mg/mL), GVL (76 mg/mL) and glucose (50 mg/mL) at different resin amounts (50 mg/mL–450 mg/mL) and equilibration time 1 h.
